# Supplementary material
Source: Research Square preprint supplement (doi:10.21203/rs.3.rs-9859541/v1)
Supplement: Supplementary file 1 [file 31af32b22b7fb6db7dd4bd6c.docx]

**Supplementary Materials and Methods**

**Highly selective small molecule Kv1.3 inhibitors bind to a cryptic pocket and stabilize the channel in a C-type inactive conformation**

Joachim Vilstrup1*, Matilde Trabuco2, Elmeri M. Jokinen3, Gavin Whitlock4, Lars Christian Rønn1, Marianne Terndrup Pedersen1, Mathieu Botte2, Florian Delbart2, Christoph P. Sager2, Olli T. Pentikäinen3, Michael Hennig2, Jakob Busch-Petersen1 and Kim Andersen1

Affiliations:

1Muna Therapeutics, Nordre Fasanvej 215, DK-2000 Frederiksberg, Denmark.

2LeadXpro, Park Innovaare, Parkstrasse 1, CH-5234 Villigen, Switzerland

3Aurlide, Lemminkäisenkatu 14-18A, FI-20520 Turku, Finland

4Sandexis Ltd, Innovation House, Discovery Park, Sandwich, Kent, United Kingdoms

* Corresponding author contact information: vilstrup@munatherapeutics.com

**Chemistry**

**List of abbreviations**

Acetonitrile (ACN), Borane dimethylsulfide (BH3.DMS), Diethylaminosulfur trifluoride (DAST), N,N-Diisopropylethylamin (DIPEA), N,N-Dimethylformamide (DMF), 1-Ethyl-3-(3-dimethylaminopropyl)carbodiimide hydrochloride (EDC.HCl), Hydroxybenzotriazole (HOBt), 1-Methylimidazole (NMI), N,N,N’,N’-Tetramethylchloroformamidinium hexafluorophosphate (TCFH)

**Dalazatide (1)**

Aquired from AmbioPharm, Inc. North Augusta.

**PAP-1 (2)**

Prepared according to published method 1.

**The two isomers of 4-(2,3-dichloro-6-hydroxyphenyl)-1-(1-methylpyrazol-4-yl)pyrrolidine-2-one 3a and 3b**

Prepared according to the procedures described in WO 2022/076285 using racemic starting materials. The final racemate (56 mg) was separated into the two isomers **3a** (22 mg) and **3b** (23 mg).

Prep-SFC (EC9174-15-P1B, **3a**: RT = 1.387 min; **3b**: RT = 1.653 min), (column: DAICEL CHIRALCEL OD (250mm * 30mm, 10um); mobile phase: [Neu-MeOH]; B%: 35%-35%, C6.2; 37min). Compound **3a** (22.0 mg, 67.5 umol, 41.5% yield) was obtained as a white solid. Compound **3b** (23.0 mg, 70.5 umol, 43.4% yield) was obtained as a white solid.

**The two isomers of 1-(3-aminopropyl)-4-(2,3-dichloro-6-hydroxyphenyl)pyrrolidine-2-one 4a and 4b**

Prepared according to the procedures described in WO 2022/076285 using racemic starting materials. The final racemate (179 mg) was separated into the two isomers **4a** (70 mg) and **4b** (68 mg).

Chiral method: SFC PREP purification was carried out using a THAR SFC 80 instrument with a Waters UV Detector 2489 by using a CHIRALPAK IG column (30.0 mm x 250 mm), 5µ operating at 35 ºC temperature, maintaining flow rate of 70 g/min, using 50% CO2 in a super critical state and 50 % of (0.3% ammonia in MeOH) as solvent. The isocratic mixture was run up to 9.0 min while maintaining isobaric condition of 100 bar. (detection at 220 nm wavelength).

**1-(4,5-dichloro-1H-indole-2-carbonyl)pyrrolidine-3-carboxamide (5)**

Acquired from Chem-Space, New Jersey.

**4-(4,5-dichloro-1H-indole-2-carbonyl)piperazin-2-one (6a)**

Aquired from Chem-Space, New Jersey.

**4-(1H-indole-2-carbonyl)piperazin-2-one (6b)**

Was acquired from Chem-Space, New Jersey.

**4-(4,5-dichloro-1-methyl-1H-indole-2-carbonyl)piperazin-2-one (6c)**

To a stirred solution of 4,5-ichloro-1-methyl-1*H*-indole-2-carboxylic acid (150.0 mg, 0.62 mmol) in DMF (2.0 mL) was added DIPEA (0.321 mL, 1.844 mmol) followed by HATU (350.4 mg, 0.92 mmol) at 0 °C. The resulting solution was stirred at rt for 30 min. Thereafter, a DMF solution of piperazin-2-one (73.8 mg, 0.74 mmol) was added dropwise into the reaction mixture and stirred at rt for 16 hours. After completion (monitored by TLC/LCMS), the reaction mixture was subjected to usual work-up. It was diluted with ethyl acetate and H2O and taken in a separatory funnel. The organic layer was separated, and aqueous layer was extracted with ethyl acetate (3 x 15 mL). The combined organic layer was washed with H2O, brine and the organic layer was dried over anhydrous. Na2SO4. After filtration, and the filtrate was evaporated to dryness under reduced pressure to give crude material. Reverse phase prep. HPLC purification of the resulting crude compound afforded 4-(4,5-dichloro-1-methyl-1*H*-indole-2-carbonyl)piperazin-2-one (80 mg, 39.9%) as white solid. %). 1H NMR (400 MHz, DMSO-d6): δ 8.19 (br s, 1H), 7.61 (d, J = 8.4 Hz, 1H), 7.45 (d, J = 8.8 Hz, 1H), 6.80 (s, 1H), 4.17 (br s, 2H), 3.79 (br s, 5H), 3.30 – 3.28 (m, 2H). LCMS (Method-A): RT 2.43 min; 326.1 [M+H]+.

Prep HPLC Method: ColuYMC Triart C18 (250 x 20mm, 5µ) operating at ambient temperature and flow rate of 16 ml/min. Mobile phase: A= 20mM Ammonium Bicarbonate in water, B=Acetonitrile; Gradient Profile: Mobile phase initial composition of 80% A and 20% B, then to 70% A and 30% B in 3 min., then to 30% A and 70% B in 24 min., then to 5% A and 95% B in 25 min., held this composition up to 29 min. for column washing, then returned to initial composition in 30 min. and held till 33 mins.

**4-(5-chloro-4-fluoro -1H-indole-2-carbonyl)piperazin-2-one (6d)**

To a stirred solution of  5-chloro-4-fluoro-1H-indole-2-carboxylic acid (150.0 mg, 0.7 mmol) in DMF (3.0 mL/mmol) was added DIPEA (0.065 mL, 0.35 mmol) followed by EDC.HCl (202.0 mg, 1.05 mmol) and HOBt (142.0mg, 1.05 mmol) and the resulting mixture was stirred at room temperature for 30 min. Thereafter, piperazin-2-one (84.0 mg, 0.84 mmol) was added into the reaction mixture and allowed to stir at room temperature for 16 h. After completion (monitored by LCMS), the reaction mixture diluted with ethyl acetate (10 mL) and H2O (10 mL) and transferred to a separatory funnel. The organic layer was separated, and aqueous layer was back extracted with ethyl acetate (3 x 10 mL). The combined organic layer was washed with H2O, brine and dried over anhydrous Na2SO4. Then, it was filtered, and the filtrate was evaporated to dryness under reduced pressure to obtain the crude compound, which was purified by reverse phase prep. HPLC to afford 4-(5-chloro-4-fluoro-1H-indole-2-carbonyl)piperazin-2-one (40.0 mg, 19%) as white solid.1H NMR (400 MHz, DMSO-d6) δ 12.16 (s, 1H), 8.21 (m, 1H), 7.31 - 7.27 (m, 2H), 7.01 (s, 1H), 4.25 – 4.23 (m, 2H), 3.92 (br s, 2H). LCMS (Method A): RT 2.25 min; 294.0 [M-H]-.

Prep HPLC Method:Preparative HPLC was done on Waters auto purification instrument.  Column name: YMC Triart C18 (250 x 20 mm, 5µm) operating at ambient temperature and flow rate of 16 ml/min. Mobile phase: A = 20mM Ammonium Bicarbonate in water, B=ACN; Gradient Profile: Mobile phase initial composition of  80% A and 20% B, then 70% A and 30% B in 3 min, then to 40% A and 60% B in 20 min., then to 5% A and 95% B in 21 min., held this composition up to 24 min. for column washing, then returned to initial composition in 26 min. and held till 28 min.

**4-(4-chloro-3,5-difluoro-1*H*-indole-2-carbonyl)piperazin-2-one (6e)**

To a stirred solution of 3,5-fluoro-4-chloro-1H-indole-2-carboxylic acid (250.0 mg, 1.08 mmol) in acetonitrile (5 ml) were added NMI (0.2 ml) and TCFH (454 mg, 1.62 mmol). After 30 min, piperazin-2-one (162 mg, 1.62 mmol) was added, and the reaction mixture was stirred at rt for 16 h. The product mass was observed by LCMS. The reaction mixture was diluted with ethyl acetate (30.0 ml) and washed with saturated aqueous NaHCO3 solution (10.0 ml). The aqueous part was back extracted with ethyl acetate (2 x 10 ml). The combined organic layer was washed with brine solution (15 ml), dried over MgSO4, filtered and evaporated in vacuum. The crude material was purified by reverse phase prep. HPLC purification to afford 4-(4-chloro-3,5-difluoro-1H-indole-2-carbonyl)piperazin-2-one (25 mg, 7.3%) as beige solid.

LC/MS: Method-A RT 2.23 min; 312.1 [M-H]-

1H-NMR (400 MHz, DMSO-d6) δ 11.92 (br s, 1H), , 8.18 (s, 1H), 7.40 -7.36 (m, 1H), 7.30 (t, J = 9.6 Hz, 1H), 4.14 (s, 2H), 3.80 (t, J = 4.8 Hz, 2H), 3.33-3.30 (m, 2H).

Prep HPLC Method: Column name: YMC Actus triart C18 (250 x 20 mm, 5µ) operating at ambient temperature and flow rate of 16 mL/min. Mobile phase: A= 20mM Ammonium bicarbonate in water, B= Acetonitrile. Gradient profile: Mobile phase initial composition of 80% A and 20% B, then to 70% A and 30% B in 3 min, then to 50% A and 50% B in 22 min, then to 5% A and 95% B in 22.5 min, held in this composition upto 24.5 min for column washing, then returned to initial composition in 25 min and held till 27 min.

**2-(azetidin-3-yloxy)-1-(4-(4-chloro-3,5-difluoro-1H-indole-2-carbonyl)piperazin-1- yl)ethan-1-one (7)**

**Step 1: *tert*-butyl 3-(2-(4-(4-chloro-3,5-difluoro-1H-indole-2-carbonyl)piperazin-1-yl)-2-oxoethoxy) azetidine-1-carboxylate**

To a stirred solution of 2-((1-(tert-butoxycarbonyl)azetidin-3-yl)oxy)acetic acid (160.0 mg, 0.69 mmol) in DMF (4.0 mL) was added DIPEA (0.6 mL, 3.46 mmol), EDCl (200.0 mg, 1.038 mmol) and HOBt (140.0 mg, 1.03 mmol) under inert atmosphere at room temperature. Then the reaction mixture was stirred for 30 min and 4-chloro-3,5-difluoro-2-[(piperazin-1-yl) carbonyl]-1H-indole (255.0 mg, 0.761 mmol) was added. The resulting mixture was stirred for 16 h at room temperature. LCMS of reaction mixture showed formation of desired product. Then the reaction mixture was quenched with cold water and extracted with ethyl acetate. The organic layer was dried over anhydrous Na2SO4, filtered and evaporated to get the crude compound which was purified by combi-Flash chromatography (eluted with 25-100 % ethyl acetate-hexane) to get tert-butyl 3-(2-(4-(4-chloro-3,5-difluoro-1H-indole-2-carbonyl)piperazin-1-yl)-2-oxoethoxy)-azetidine-1-carboxylate (260.0 mg, 73%) as an off white solid. LCMS (Method-A): RT 3.24 min; 513.2 [M+H]+.

**Step 2: 2-(azetidin-3-yloxy)-1-(4-(4-chloro-3,5-difluoro-1H-indole-2-carbonyl)piperazin-1-yl)ethan-1-one**

To a stirred solution of tert-butyl 3-(2-(4-(4-chloro-3,5-difluoro-1H-indole-2-carbonyl)piperazin-1-yl)-2-oxoethoxy)azetidine-1-carboxylate (350.0 mg, 0.68 mmol) in DCM (4.0 mL) was added TFA (0.4 mL,5.46 mmol) at 0°C under inert atmosphere. The resulting mixture was stirred for 5 h at room temperature and the reaction mixture was concentrated under vacuo to get crude product, which was basified with Et3N and further concentrated under vacuo to get crude compound which was purified by prep-HPLC (Method E) to get desired compound 2-(azetidin-3-yloxy)-1-(4-(4-chloro-3,5-difluoro-1H-indole-2-carbonyl)piperazin-1-yl)ethan-1-one (195 mg, 69%) as off white solid.

LC/MS: Method A: RT 2.13min; 413.2 [M+H]+

1H NMR (400 MHz, DMSO-d6) δ 8.31 (s, 1H), 7.32-7.29 (m, 2H), 4.34-4.32 (m, 1H), 4.21 (s, 2H) 3.78-3.73 (m, 2H), 3.65-3.63 (m, 6H), 3.54-3.47 (m, 2H), 3.47-3.34 (m, 2H).

1H NMR (400 MHz, DMSO-*d6* at 100 °C) d 8.18 (s, 1H), 7.39 (d, J = 8Hz, 1H), 7.24 (t, *J* = 8.8 Hz, 1H), 4.36-4.33 (m, 1H), 4.14 (s, 2H), 3.67-3.49 (m, 12H).

**Starting material for 6a: 4,5-dichloro-1-methyl-1*H*-indole-2-carboxylic acid:**

To a stirred solution of ethyl 4,5-dichloro-1*H*-indole-2-carboxylate (250.0 mg, 0.973 mmol) in DMF (3.0 mL) was added K2CO3 (470.5 mg, 3.40 mmol) followed by methyl iodide (0.15 mL, 2.4 mmol). The resulting mixture was heated at 60 °C for 12 h in a sealed vessel. After completion (monitored by TLC), the reaction mixture was filtered and diluted with ethyl acetate and H2O and the mixture was transferred to a separatory funnel. The organic layer was separated, and aqueous layer was extracted with ethyl acetate (3 x 10 mL). The combined organic layers were washed with H2O, brine and dried over anhydrous. Na2SO4,filtered, and the filtrate was evaporated to dryness under reduced pressure to give crude material, which upon purification by combi flash chromatography (eluent: 10% ethyl acetate-hexane) afforded ethyl 4,5-dichloro-1-methyl-1*H*-indole-2-carboxylate (210 mg, 79.3%) as white solid. 1H NMR (400 MHz, CDCl3): 1H NMR (400 MHz, CDCl3): δ 7.36 (d, J = 8.9 Hz, 1H), 7.34 (s, 1H), 7.22 (d, J = 8.9 Hz, 1H), 4.38 (q, J = 7.0 Hz, 2H), 4.06 (s, 3H), 1.43 (t, J = 7.0 Hz, 3H). LCMS (Method-D): RT 4.15 min; 271.8 [M+H]+.

To a stirred solution of ethyl 4,5-dichloro-1-methyl-1*H*-indole-2-carboxylate (210.0 mg, 0.78 mmol) in THF-H2O (6 mL, 2:1) was added LiOH.H2O (39.0 mg, 0.93 mmol) at 0 °C. The resulting mixture was stirred at rt for 16 h. After completion (monitored by TLC), the reaction mixture was acidified with 2N aqueous HCl solution, diluted with 5% MeOH-DCM and taken in a separatory funnel. The organic layer was separated, and aqueous layer was extracted with 5% MeOH-DCM (3 x 10 mL). The combined organic layer was washed with H2O, brine and then dried over anhydrous Na2SO4. Then organic layer was filtered, and the filtrate was evaporated to dryness under reduced pressure to give 4,5-dichloro-1-methyl-1*H*-indole-2-carboxylic acid (180 mg, 95.17%) as white solid. 1H NMR (400 MHz, DMSO-d6): δ 13.3 (br s, 1H), 7.66 (d, J = 8.9 Hz, 1H), 7.50 (d, J = 8.9 Hz, 1H), 7.166 (s, 1H), 4.05 (s, 3H). LCMS (Method-D): RT 2.66 min; 241.8 [M-H]-.

**Starting material for 6d: 3,5-fluoro-5-chloro-1H-indole-2-carboxylic acid**

**Step-1:** 4-chloro-3,3,5-trifluoroindolin-2-one:

To a stirred solution 4-chloro-5-fluoro-2,3-dihydro-1H-indole-2,3-dione (14.0 g, 70.2 mmol) in DCM (160 mL) was added DAST (23.2 mL, 175.4 mmol) at 0 °C under N2 atmosphere. The reaction mixture (suspension) was stirred for 6h at room temperature. By this time suspension turned into solution. The reaction mixture was poured into saturated aqueous NaHCO3 solution (200 mL) and extracted with DCM (3 x 200 mL). The combined organic layer was washed with brine, dried over anhydrous Na2SO4, filtered and concentrated under reduced pressure. The residue was purified by combiflash chromatography (0 – 5% ethyl acetate-hexane) to give 3,3-difluoroindolin-2-one (8.5 g, 49%) as reddish solid.

**Step-2:** 4-Chloro-3,5-difluoro-1*H*-indole:

To a stirred solution of 4-chloro-3,3,5-trifluoro-2,3-dihydro-1*H*-indol-2-one (10.0 g, 45.1 mmol) in dry THF (150 mL) was added BH3.DMS (2M in THF, 67.5 mL, 135.4 mmol) dropwise under nitrogen at 0 °C. The reaction mixture was stirred at room temperature for 3 h. After completion (monitored by TLC), the reaction mixture was quenched with 10% aqueous citric acid solution (until gas evolution ceased), diluted with water and extracted with ethyl acetate (3 x 200 mL). Combined organic layer was washed with water (2 x 200 mL) and brine (200 mL). The organic layer was then dried over anhydrous Na2SO4, filtered and the filtrate was evaporated under reduced pressure to provide crude compound. The resulting crude product was purified by combiflash chromatography (eluent: 10% ethyl acetate in hexane) to afford 4-chloro-3,5-difluoro-1*H*-indole (6 g, 71%) as brown solid. 1H NMR (400 MHz, DMSO-d6) δ 11.28 (br-s, 1H), 7.52 (t, J= 2.6 Hz, 1H), 7.36 - 7.32 (m, 1 H), 7.15 (t, J = 9.4 Hz, 1H). LCMS (Method C): RT 2.19 min; 186.01 [M-H]-.

**Step-3:** 4-Chloro-3,5-difluoro-1-tosyl-1*H*-indole:

To a stirred solution of 4-chloro-3,5-difluoro-1*H*-indole (3.6 g, 19.19 mmol) in dry DMF (40 mL) was added NaH (1.0 g, 21.1 mmol, 60% in mineral oil) portion-wise at 0 °C over a period of 10 min. The mixture was stirred at same for 15 min. *p*-TsCl (5.4 g, 28.79 mmol) was added,and the mixture was stirred at room temperature for 2 h. After reaction completion (monitored by TLC), the reaction mixture was quenched with satd. cold aqueous NH4Cl solution diluted with ethyl acetate (100 mL) and H2O (100 mL) and transferred to a separatory funnel. The organic layer was separated, and aqueous layer was extracted with ethyl acetate (3 x 100 mL). The combined organic layer was washed with H2O, brine and dried over anhydrous Na2SO4,filtered and the filtrate was evaporated to dryness under reduced pressure to get crude compound, which was purified using silica gel column chromatography (eluent: 25% ethyl acetate in hexane) to get 4-chloro-3,5-difluoro-1-(4-methyl-1-sulfonylphenyl)-1*H*-indole (4.8 g, 73%) as white solid. 1H NMR (400 MHz, DMSO-d6) δ 8.17 (s, 1H), 7.98 (d, J = 8.6 Hz, 1H), 7.89 (d, J = 7.9 Hz, 2 H), 7.48 (t, J = 9.5 Hz, 1H), 7.41 (d, J = 7.8 Hz, 2H), 2.34 (s, 3H).

**Step-4: Ethyl 4-chloro-3,5-difluoro-1-tosyl-1*H*-indole-2-carboxylate:**

*n*-Butyllithium (2.5 M in hexane, 6.4 mL) was added dropwise to a stirred solution of 4-chloro-3,5-difluoro-1-[(4-methylbenzene)sulfonyl]-1*H*-indole (5.0 g, 14.6 mmol) in dry THF (80 mL) at -78 °C. The resulting mixture was stirred at same temperature for 30 min. Thereafter, ethyl chroroformate (1.67 mL, 17.56 mmol) was added dropwise into the reaction mixture at -78 °C. After 10 min, cooling bath was removed and the mixture warmed to room temperature. After 2-3 h, the reaction mixture was quenched with satd. aqueous NH4Cl solution and extracted with ethyl acetate (3 x 100 mL). The combined organic layer was washed with H2O (100 mL), brine and then dried over anhydrous Na2SO4. Organic part was then filtered, and the filtrate was evaporated to dryness under reduced pressure. The resulting crude was purified by combiflash chromatography (eluent: 5% ethyl acetate in hexane) to get ethyl 4-chloro-3,5-difluoro-1-tosyl-1*H*-indole-2-carboxylate (4.2 g, 69%) as an off-white solid. 1H NMR (400 MHz, DMSO-d6) δ 8.07 (d, J = 7.6 Hz, 1H), 7.81 (d, J = 8.3 Hz, 2H), 7.63 (t, J = 9.5 Hz, 21H), 7.44 (d, J = 8.2 Hz, 1H), 4.42 (q, J = 7.0 Hz, 2H), 1.98 (s, 3H), 1.35 (t, J = 7.0 Hz, 3H). LCMS (Method C): RT 2.56 min; 414.1 [M+H]+.

**Step-5: 4-Chloro-3,5-difluoro-1*H*-indole-2-carboxylic acid:**

To a stirred solution of ethyl 4-chloro-3,5-difluoro-1-tosyl-1*H*-indole-2-carboxylate (4.2 g, 10.1 mmol) in THF-H2O mixture (80.0 mL, 1:3 ratio) was added LiOH.H2O (4.3 g, 101.5 mmol). The resulting mixture was stirred for 6 h at 60 oC. After completion (monitored by TLC), THF was evaporated from the reaction mixture under reduced pressure. The aqueous layer was washed with ethyl acetate (100 mL) to eliminate any non-polar impurity. Then, the pH of the aqueous layer was adjusted to ~4-5 with 6N HCl. The resulting solution was then extracted with ethyl acetate (3 x 100 mL). The combined organic layer was washed with brine and dried over anhydrous Na2SO4, filtered and the filtrate was evaporated to dryness under reduced pressure to provide 4-chloro-3,5-difluoro-1*H*-indole-2-carboxylic acid (2.0 g, 85%) as grey solid. 1H NMR (400 MHz, DMSO-d6) δ 13.53 (br s, 1H), 12.03 (s, 1H), 7.48 - 7.32 (m, 2H). LCMS (Method A): RT 2.36 min; 230.2 [M-H]-.

**Starting material for 6d: (4-chloro-3,5-difluoro-1H-indol-2-yl)(piperazin-1-yl)methanone**

**Step 1:** Synthesis of tert-butyl tert-butyl 4-(4-chloro-3,5-difluoro-1H-indole-2-carbonyl) piperazine-1-carboxylate

To a stirred solution of 4-chloro-3,5-difluoro-1H-indole-2-carboxylic acid (35.0 g, 151.1 mmol) in DMF (350 ml) was added DIPEA (131 ml, 756 mmol) at 0°C followed by addition of EDCI (37.5 g, 196.5 mmol) and HOBT (26.5 g, 196.5 mmol). After 30 min at 0 °C, tert-butyl piperazine-1-carboxylate (34.0 g, 181.4 mmol) was added and the resulting mixture was stirred for 16 h. The reaction mixture was quenched in ice cold water (500 ml) and extracted with ethyl acetate (2 X 800 ml). Combined organic was washed with brine solution (500 ml), dried over anhydrous Na2SO4, filtered and concentrated in vacuo. Crude product was purified using column chromatography (80-100% gradient of ethyl acetate in hexane) to afford tert-butyl 4-[(4-chloro-3,5-difluoro-1H-indol-2-yl)carbonyl] piperazine-1-carboxylate (40.0 g, 66.2%) as yellow solid. 1H NMR (400 MHz, DMSO-d6) δ 11.95 (br s, 1H), 7.39 – 7.35 (m, 1H), 7.29 (t, J = 9.2 Hz, 1H), 3.61 (br s, 4H), 3.42 (br s, 4H). LCMS (Method A): RT 3.00 min; 398.2 [M-H]-.

**Step 2:** Synthesis of (4-chloro-3,5-difluoro-1H-indol-2-yl)(piperazin-1-yl) methanone

To a stirred solution of tert-butyl 4-[(4-chloro-3,5-difluoro-1H-indol-2-yl)carbonyl] piperazine-1-carboxylate (48.0 g, 120.1 mmol) in DCM (500 ml) was added TFA (92 ml, 1201 mmol) at 0°C over a period of 30 min. Reaction mixture was allowed to come to room temperature and stirred for an further 3h. The reaction mixture was concentrated to dryness and the crude product was dissolved in methanol (100 ml) and pH was adjusted to -8 by adding freshly dried Amberlyst A21 resin, filtered, concentrated and the resulting product was purified using SCX column, concentrated and was triturated with pentane to get 4-chloro-3,5-difluoro-2-[(piperazin-1-yl)carbonyl]-1H-indole (30.2 g, 83.9%) as off white solid. 1H NMR (400 MHz, DMSO-d6) δ 11.93 (br s, 1H), 7.34 – 7.33 (m, 1H), 7.27 (t, J = 9.3 Hz, 1H), 3.53 (br s, 4H), 2.75 - 2.72 (m, 4H). LCMS (Method A): RT 2.17 min; 300.1 [M+H]+.

**References**

1. Schmitz, A. et al. Design of PAP-1, a Selective Small Molecule Kv1.3 Blocker, for the Suppression of Effector Memory T Cells in Autoimmune Diseases. Mol. Pharmacol. 68, 1254–1270 (2005).
