# Supplementary material
Source: Research Square preprint supplement (doi:10.21203/rs.3.rs-9859541/v1)
Supplement: Supplementary file 3 [file 95a5e9a596346dc333cdd636.pdf]

**Table 2.** Inhibitor potencies measured as  $IC_{50}$  values in nanomolar for indicated Kv1.3 and Kv1.5 variants evaluated in Syncropatch electrophysiology assay. Values in parenthesis represent % inhibition at top concentration tested. Top concentration tested is indicated with > when no  $IC_{50}$  could be determined. For each variant, amino acid substitutions at site VSD and site P-loop is indicated. Green indicate Kv1.3 WT and Blue Kv1.5 WT. NT = Not tested.

|             | Kv1.3<br>WT                                                                                                                 | Kv1.3 <sup>Kv1.5 VSD</sup>                                                                                                  | Kv1.3 <sup>Kv1.5 P-loop</sup>                                                                                               | Kv1.5<br>WT                                                                                                                 | Kv1.5 <sup>Kv1.3 VSD</sup>                                                                                                  | Kv1.5 <sup>Kv1.3 P-loop</sup>                                                                                               |
|-------------|-----------------------------------------------------------------------------------------------------------------------------|-----------------------------------------------------------------------------------------------------------------------------|-----------------------------------------------------------------------------------------------------------------------------|-----------------------------------------------------------------------------------------------------------------------------|-----------------------------------------------------------------------------------------------------------------------------|-----------------------------------------------------------------------------------------------------------------------------|
| Site VSD    | T <sup>322</sup>                                                                                                            | G <sup>322</sup>                                                                                                            | T <sup>322</sup>                                                                                                            | G <sup>351</sup>                                                                                                            | T <sup>351</sup>                                                                                                            | T <sup>351</sup>                                                                                                            |
| Site P-loop | D <sup>423</sup><br>P <sup>424</sup><br>T <sup>425</sup><br>S <sup>426</sup><br>G <sup>427</sup><br>...<br>H <sup>451</sup> | D <sup>423</sup><br>P <sup>424</sup><br>T <sup>425</sup><br>S <sup>426</sup><br>G <sup>427</sup><br>...<br>H <sup>451</sup> | N <sup>423</sup><br>Q <sup>424</sup><br>G <sup>425</sup><br>T <sup>426</sup><br>H <sup>427</sup><br>...<br>R <sup>451</sup> | N <sup>459</sup><br>Q <sup>460</sup><br>G <sup>461</sup><br>T <sup>462</sup><br>H <sup>463</sup><br>...<br>R <sup>487</sup> | N <sup>459</sup><br>Q <sup>460</sup><br>G <sup>461</sup><br>T <sup>462</sup><br>H <sup>463</sup><br>...<br>R <sup>487</sup> | D <sup>459</sup><br>P <sup>460</sup><br>T <sup>461</sup><br>S <sup>462</sup><br>G <sup>463</sup><br>...<br>H <sup>487</sup> |
| <b>1</b>    | 0.290                                                                                                                       | 0.295                                                                                                                       | >3.6 (24%)                                                                                                                  | >3.6 (10%)                                                                                                                  | >3 (4.5%)                                                                                                                   | 0.463                                                                                                                       |
| <b>2</b>    | 63.5                                                                                                                        | 48.4                                                                                                                        | 96.1                                                                                                                        | 300.8                                                                                                                       | 262.2                                                                                                                       | 101.44                                                                                                                      |
| <b>3a</b>   | 3.77                                                                                                                        | 3.36                                                                                                                        | >120 (37%)                                                                                                                  | >120 (12%)                                                                                                                  | >120 (6%)                                                                                                                   | 5.9                                                                                                                         |
| <b>6a</b>   | 279                                                                                                                         | 158                                                                                                                         | >3600 (21.3%)                                                                                                               | NT                                                                                                                          | >3600 (0%)                                                                                                                  | 400                                                                                                                         |
