# Supplementary material
Source: Research Square preprint supplement (doi:10.21203/rs.3.rs-9859541/v1)
Supplement: Supplementary file 4 [file 9d21251831e526e5ae5a7091.docx]

**Additional information**

Supplementary information covering compound synthesis is available.
