# Supplementary material
Source: Research Square preprint supplement (doi:10.21203/rs.3.rs-9859541/v1)
Supplement: Supplementary file 6 [file c2e59359898d0a66cff2dc3e.pdf]

**Supplementary Table 1. Cryo-EM data collection, refinement and validation statistics.** The transmembrane domain (TM) and T1 domain were refined separately, using each corresponding Focused Refinement map. The models were merged at the final step, using the Overall map as alignment guide.

|                                           | #1 Kv1.3 with 4<br><b>Overall map</b><br>(EMD-57536)<br>(PDB 30BF) | #1.1 Kv1.3 with 4<br><b>TM Focused<br/>Refinement</b><br>(EMD-57533) | #1.2 Kv1.3 with 4<br><b>T1 Focused<br/>Refinement</b><br>(EMD-57535) | #2 Kv1.3 with 7<br><b>Overall map</b><br>(EMDB-58170)<br>(PDB 30ZB) | #2.1 Kv1.3 with 7<br><b>TM Focused<br/>Refinement</b><br>(EMDB-57753) | #2.2 Kv1.3 with 7<br><b>T1 Focused<br/>Refinement</b><br>(EMDB-57754) |
|-------------------------------------------|--------------------------------------------------------------------|----------------------------------------------------------------------|----------------------------------------------------------------------|---------------------------------------------------------------------|-----------------------------------------------------------------------|-----------------------------------------------------------------------|
| <b>Data collection and processing</b>     |                                                                    |                                                                      |                                                                      |                                                                     |                                                                       |                                                                       |
| Magnification                             | 130KX                                                              |                                                                      |                                                                      | 165KX                                                               |                                                                       |                                                                       |
| Voltage (kV)                              | 300                                                                |                                                                      |                                                                      | 300                                                                 |                                                                       |                                                                       |
| Electron exposure (e-/Å <sup>2</sup> )    | 60                                                                 |                                                                      |                                                                      | 50                                                                  |                                                                       |                                                                       |
| Defocus range (µm)                        | 0.5-3                                                              |                                                                      |                                                                      | 0.5-3                                                               |                                                                       |                                                                       |
| Pixel size (Å)                            | 0.926                                                              |                                                                      |                                                                      | 0.726                                                               |                                                                       |                                                                       |
| Symmetry imposed                          | C4                                                                 |                                                                      |                                                                      | C4                                                                  |                                                                       |                                                                       |
| Initial particle images (no.)             | 3280710                                                            |                                                                      |                                                                      | 5735462                                                             |                                                                       |                                                                       |
| Final particle images (no.)               | 127851                                                             |                                                                      |                                                                      | 277705                                                              |                                                                       |                                                                       |
| Map resolution (Å)                        | 2.95                                                               | 2.87                                                                 | 2.89                                                                 | 2.79                                                                | 2.66                                                                  | 2.82                                                                  |
| FSC threshold                             | 0.143                                                              | 0.143                                                                | 0.143                                                                | 0.143                                                               | 0.143                                                                 | 0.143                                                                 |
| Map resolution range (Å)                  | 1.9-3.7                                                            | 1.9-3.7                                                              | 1.9-3.7                                                              | 1.9-3.7                                                             | 1.9-3.7                                                               | 1.9-3.7                                                               |
| Map sharpening B factor (Å <sup>2</sup> ) |                                                                    |                                                                      |                                                                      |                                                                     |                                                                       |                                                                       |
|                                           |                                                                    | Residues 208 - 491                                                   | Residues 104 - 207                                                   |                                                                     | Residues 208 - 491                                                    | Residues 104 - 207                                                    |
| <b>Refinement</b>                         |                                                                    |                                                                      |                                                                      |                                                                     |                                                                       |                                                                       |
| Initial model used (PDB code)             |                                                                    | 7SSY                                                                 | 7SSY                                                                 |                                                                     | 7SSY                                                                  | 7SSY                                                                  |
| Model composition                         |                                                                    |                                                                      |                                                                      |                                                                     |                                                                       |                                                                       |
| Non-hydrogen atoms                        |                                                                    | 7855                                                                 | 3580                                                                 |                                                                     | 7891                                                                  | 3580                                                                  |
| Protein residues                          |                                                                    | 976                                                                  | 416                                                                  |                                                                     | 976                                                                   | 416                                                                   |
| Ligands                                   |                                                                    | 3 K <sup>+</sup><br>4 4                                              |                                                                      |                                                                     | 3 K <sup>+</sup><br>4 7                                               |                                                                       |
| <i>B</i> factors (Å <sup>2</sup> )        |                                                                    |                                                                      |                                                                      |                                                                     |                                                                       |                                                                       |
| Protein                                   |                                                                    | 85                                                                   | 137                                                                  |                                                                     | 59                                                                    | 103                                                                   |
| Ligand                                    |                                                                    | 80                                                                   |                                                                      |                                                                     | 53                                                                    |                                                                       |
| R.m.s. deviations                         |                                                                    |                                                                      |                                                                      |                                                                     |                                                                       |                                                                       |
| Bond lengths (Å)                          |                                                                    | 0.003                                                                | 0.002                                                                |                                                                     | 0.004                                                                 | 0.003                                                                 |
| Bond angles (°)                           |                                                                    | 0.534                                                                | 0.571                                                                |                                                                     | 0.545                                                                 | 0.561                                                                 |
| Validation                                |                                                                    |                                                                      |                                                                      |                                                                     |                                                                       |                                                                       |
| MolProbity score                          |                                                                    | 1.60                                                                 | 1.62                                                                 |                                                                     | 1.42                                                                  | 1.48                                                                  |
| Clashscore                                |                                                                    | 5.67                                                                 | 4.54                                                                 |                                                                     | 7.48                                                                  | 4.68                                                                  |
| Poor rotamers (%)                         |                                                                    | 1.75                                                                 | 1.82                                                                 |                                                                     | 1.05                                                                  | 2.08                                                                  |
| Ramachandran plot                         |                                                                    |                                                                      |                                                                      |                                                                     |                                                                       |                                                                       |
| Favored (%)                               |                                                                    | 97.48                                                                | 96.81                                                                |                                                                     | 98.32                                                                 | 98.04                                                                 |
| Allowed (%)                               |                                                                    | 2.52                                                                 | 3.19                                                                 |                                                                     | 1.68                                                                  | 1.96                                                                  |
| Disallowed (%)                            |                                                                    | 0                                                                    | 0                                                                    |                                                                     | 0                                                                     | 0                                                                     |
